# Supplementary material for: ISG15 induction is required during L1-mediated colon cancer progression and metastasis
Source: PubMed Central journal article supplement (PMC6935256; doi:10.18632/oncotarget.27390), 2019-12-24
Supplement: oncotarget-10-7122-s001.pdf [file oncotarget-10-7122-s001.pdf]

**Supplementary Table 1: Proteins secreted at higher level from LS 174T cells expressing L1 compared to control LS 174T cells**

| Gene symbol | Description                                                                                   | Fold change |
|-------------|-----------------------------------------------------------------------------------------------|-------------|
| EPS8L3      | Epidermal growth factor receptor kinase substrate 8-like protein 3                            | 584.5       |
| STXBP2      | Syntaxin-binding protein 2                                                                    | 475.9       |
| ISG15       | Ubiquitin-like protein ISG15                                                                  | 231         |
| SMARCE1     | SWI/SNF-related matrix-associated actin-dependent regulator of chromatin subfamily E member 1 | 209.1       |
| SNX5        | Sorting nexin-5                                                                               | 104.3       |
| TRIP6       | Thyroid receptor-interacting protein 6                                                        | 100.6       |
| PARVA       | Alpha-parvin                                                                                  | 84.6        |
| PODXL2      | Podocalyxin-like protein 2                                                                    | 82.3        |
| IRF2BP2     | Interferon regulatory factor 2-binding protein 2                                              | 71.83       |
| PELP1       | Proline-, glutamic acid- and leucine-rich protein 1                                           | 38.3        |
| MST1        | Hepatocyte growth factor-like protein                                                         | 28.3        |
| LPP         | Lipoma-preferred partner                                                                      | 25.2        |
| MAP7        | Ensconsin                                                                                     | 24.8        |
| OCN         | Occludin                                                                                      | 22.9        |
| ROCK2       | Rho-associated protein kinase 2                                                               | 20.9        |
| CDCP1       | CUB domain-containing protein 1                                                               | 18.8        |
| VCAN        | Versican core protein                                                                         | 18.1        |
| ACTR1B      | Beta-centractin                                                                               | 14.5        |

Mass spectrometric analysis of proteins secreted into the cell culture medium from LS 174T cells stably expressing L1 compared to LS 174T cells transfected with pcDNA3. Proteins whose level was increased >10 fold in L1-expressing cells are shown.

**Supplementary Table 2: Sequences of shRNA targeted against ISG15 RNA**

| Name      | Primer sequence                                                   |
|-----------|-------------------------------------------------------------------|
| shISG15-1 | GATCCCCCGGAAATAAAGGCTGTTGTTTCAAGAGAACAACAGCC<br>TTTATTTCCGTTTTTA  |
| shISG15-2 | GATCCCCGCGCAGATCACCCAGAAGATTCAAGAGATCTTCTGGG<br>TGATCTGCGCTTTTTTA |
| shISG15-3 | GATCCCCCTGAGCATCCTGGTGAGGATTCAAGAGATCCTCACCA<br>GGATGCTCAGTTTTTA  |
